# Supplementary material for: Augmentation of the therapeutic efficacy of WEE1 kinase inhibitor AZD1775 by inhibiting the YAP–E2F1–DNA damage response pathway axis
Source: PubMed Central journal article supplement (PMC5986022; doi:10.1002/2211-5463.12440), 2018-05-22
Supplement: FEB4-8-1001-s001.pdf [file FEB4-8-1001-s001.pdf]

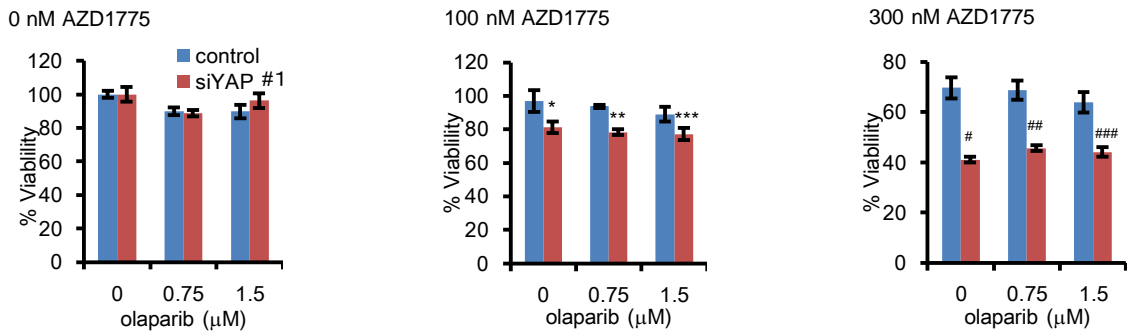

**Figure S1. YAP depletion sensitized OVCAR-8 cells to AZD1775-olaparib.**

YAP was depleted by siRNA, and the cells were treated with the indicated amount of AZD1775 with gemcitabine for 4 days. Viability was measured by MTT assay. The data is representative of at least three independent experiments. Significant differences between the groups were evaluated using an independent *t*-test.

\* $P=0.02$ , \*\* $P=0.0001$ , \*\*\* $P=0.02$ , # $P=0.0004$ , ## $P=0.0006$ , ### $P=0.002$ .

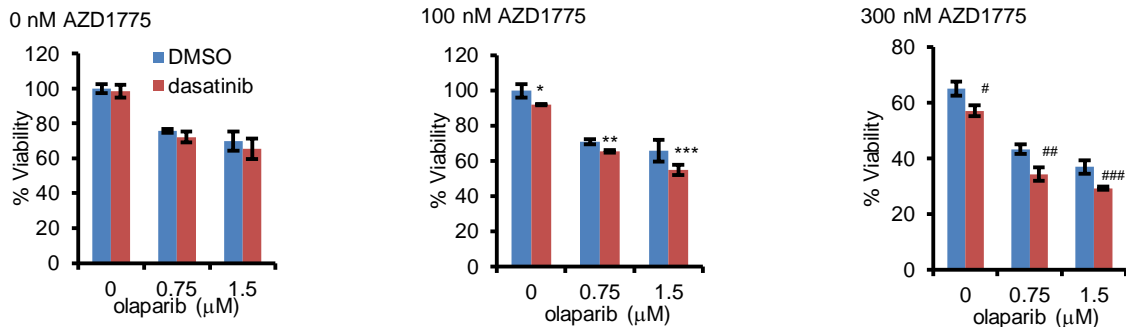

**Figure S2. Dasatinib sensitized OVCAR-8 cells to AZD1775-olaparib.**

The cells were treated with the indicated amount of AZD1775 with gemcitabine in the presence or absence of 10 nM dasatinib for 4 days. The data is representative of at least three independent experiments. Significant differences between the groups were evaluated using an independent *t*-test. \**P*=0.03, \*\**P*=0.004, \*\*\**P*=0.05, #*P*=0.01, ##*P*=0.0007, ###*P*=0.006.
